# Supplementary material
Source: PubMed Central journal article supplement (PMC2965796)
Supplement: NIHMS200182-supplement-01.pdf [file NIHMS200182-supplement-01.pdf]

## Supplementary Information

### *Biotinylated Heparin-binding Peptide Amphiphile*

A biotinylated version of the heparin-binding peptide amphiphile (biotinHBPA; Fig. S1) was synthesized for specific labeling of HBPA with streptavidin-conjugated markers based on previous work [1]. A biotinylated lysine purchased from NovaBiochem was coupled to a RINK amide resin (NovaBiochem) using standard fluorenylmethoxycarbonyl (Fmoc) solid phase peptide synthesis. The remainder of the peptide was synthesized and purified using the methods described previously [2].

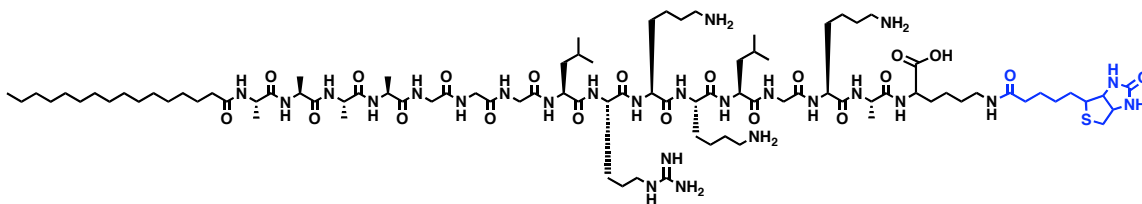

**Figure S1.** Chemical structure of biotinHBPA with biotin (blue).

### *Islet Endothelial Cell Sprouting Assay*

The non-heparin-binding peptide amphiphile (PA) with the sequence VVAEE (Fig. S2) was synthesized and purified using methods described previously [3].

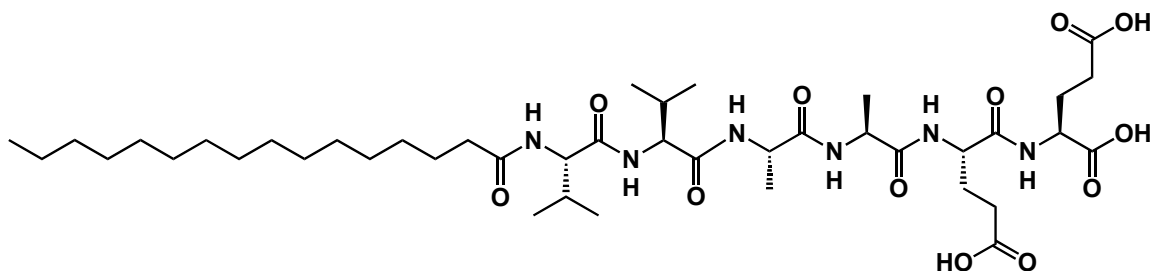

**Figure S2.** Chemical structure of non-heparin-binding peptide amphiphile with the peptide sequence VVAEE.

Islets were embedded in the VVAEE PA hydrogel, which provided a 3D matrix to support sprouting. Islets were stained with Live/Dead™ Viability/Cytotoxicity Kit to visualize sprouts, and sprouts were defined as cord-like, linear cell extensions out of the islet as shown in Fig. S3.

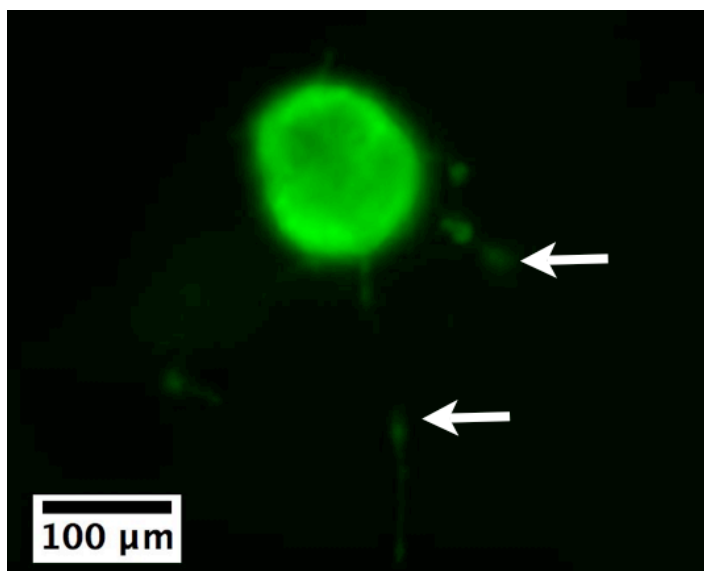

**Figure S3.** Fluorescence microscopy image of murine islet embedded in the VVAEE PA hydrogel on Day 1 stained with calcein (green) to visualize

sprouting. Arrows indicate capillary sprouts protruding from the islet into the surrounding matrix.

### *Cryogenic Transmission Electron Microscopy*

HBPA and heparin were reconstituted at 1 mg/mL in water and phosphate buffered saline (PBS; HyClone), respectively. HBPA and heparin were mixed at equal volume then diluted for a final concentration of 0.1 mg/mL each HBPA and heparin. HBPA without heparin was also diluted to 0.1 mg/mL to evaluate nanofiber formation in the absence of heparin. Immediately following dilution, the sample was prepared for cryogenic transmission electrosocopy (cryoTEM).

A Vitrobot Mark IV equipped with controlled humidity and temperature was used for plunging samples. A small volume of the HBPA-heparin solution was deposited on a copper TEM grid with holey carbon support film (Electron Microscopy Sciences) and held in place with tweezers mounted to the Vitrobot. The specimen was blotted in 90-95% humidity and plunged into a liquid ethane reservoir that was cooled by liquid nitrogen. The vitrified samples were transferred in liquid nitrogen to a Gatan 626 cryo-holder through a cryo-transfer state and imaged using a JEOL 1230 microscope with an accelerating voltage of 100kV.

We observed HBPA nanofibers at the concentrations used (Fig. S4) with morphologies similar to those previously observed [4]. The addition of growth factors is not expected to affect nanofiber morphology since they are used at

concentrations (100 ng/mL) 1000 times less than the HBPA and heparin concentrations (0.1 mg/mL).

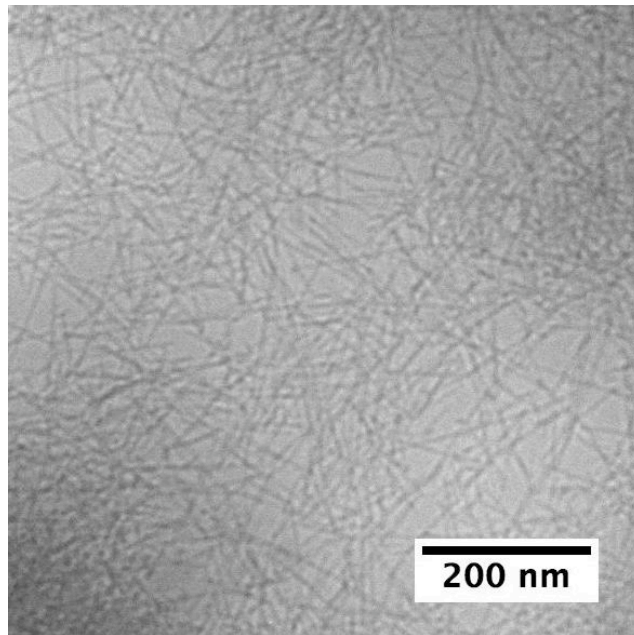

**Figure S4.** Cryogenic TEM micrograph of HBPA nanofibers formed from 0.1 mg/mL HBPA and 0.1 mg/mL heparin.

#### *Islet viability*

Islets immediately after isolation on day 0 were stained using Live/Dead™ Viability/Cytotoxicity Kit and imaged on a Nikon inverted fluorescent microscope.

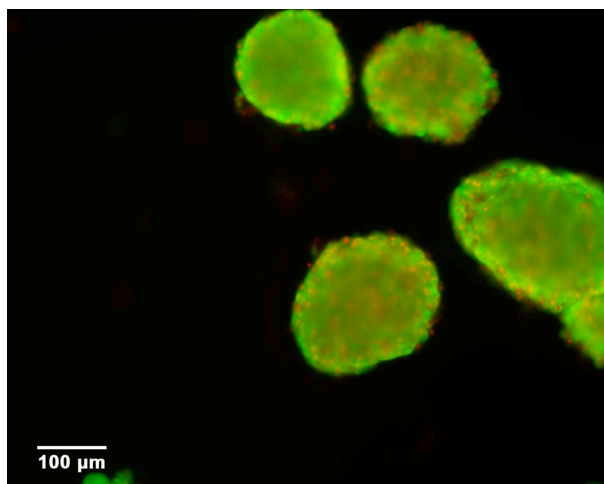

**Figure S5.** Fluorescence microscopy images of murine islets after isolation on Day 0 showing live (green) and dead (red) cells.

1. Guler MO, Soukasene S, Hulvat JF, Stupp SI. Presentation and recognition of biotin on nanofibers formed by branched peptide amphiphiles. *Nano Lett* 2005;5(2):249-252.
2. Rajangam K, Arnold MS, Rocco MA, Stupp SI. Peptide amphiphile nanostructure-heparin interactions and their relationship to bioactivity. *Biomaterials* 2008;29(23):3298-3305.
3. Ghanaati S, Webber MJ, Unger RE, Orth C, Hulvat JF, Kiehna SE, et al. Dynamic in vivo biocompatibility of angiogenic peptide amphiphile nanofibers. *Biomaterials* 2009;30(31):6202-6212.
4. Rajangam K, Behanna HA, Hui MJ, Han XQ, Hulvat JF, Lomasney JW, et al. Heparin binding nanostructures to promote growth of blood vessels. *Nano Lett* 2006;6(9):2086-2090.
